# Supplementary material for: Loss of Neogenin1 in human colorectal carcinoma cells causes a partial EMT and wound-healing response
Source: PubMed Central journal article supplement (PMC6411945; doi:10.1038/s41598-019-40886-y), 2019-03-11

## Supplementary information

### **Loss of *Neogenin1* in human colorectal carcinoma cells causes a partial EMT and wound-healing response**

Vishal Chaturvedi<sup>1</sup>, Alexandre Fournier-Level<sup>1</sup>, Helen M Cooper<sup>2</sup>, Michael J. Murray<sup>1</sup>

<sup>1</sup> School of Biosciences, The University of Melbourne, Melbourne, Victoria 3010, Australia

<sup>2</sup> The University of Queensland, Queensland Brain Institute, Brisbane, Queensland 4072, Australia

Corresponding author: [murraym@unimelb.edu.au](mailto:murraym@unimelb.edu.au). Phone: [+61383447139](tel:+61383447139)

**Supplementary Figure S1** *Neo1* knockdown in Caco-2 cells was confirmed by Western blot analysis. Representative blot with three biological replicates from one experiment. The boxed region has been shown in Figure 1. Same blot has been used for GAPDH probing after being stripped using a mild stripping buffer (Abcam)

**Supplementary Figure S2** No significant change in E-Cad protein levels after *Neo1* knockdown. Each band represents cell lysate proteins from a biological replicate from three independent experiments. The boxed region has been shown in Figure 1 and the blot has been scanned at high and low contrast. Same blot has been used for GAPDH probing after being stripped using a mild stripping buffer (Abcam)

**Supplementary Figure S3** Western blot for ZO-1 in control and *Neo1*-siRNA treated cells. The boxed region has been shown in Figure 1 and the blot has been scanned at high and low contrast. Blot outline has been marked using dotted lines

**Supplementary Figure S4** **a.** DLD-1, RKO, and SW480 cells treated with control or *Neo1*-siRNA and stained for F-Actin and immunostained for E-Cad. siRNA was transfected into 1-day old epithelia and cells stained after 2 days. Scale bar-20 $\mu$ m. **b.** RT-qPCR of *Neo* relative to the reference gene (*TBP*) in different CRC lines. Error bars show SEM; p-values based on two-tailed student's t-test relative to Caco-2 levels.

**Supplementary Figure S5** Significant upregulation of fibronectin protein levels after *Neo1* knockdown. Each band represents cell lysate proteins from a biological replicate from three independent experiments. The boxed region has been shown in Figure 4 and the blot has been scanned at high and low contrast. Same blot has been used for GAPDH probing after being stripped using a mild stripping buffer (Abcam).

**Supplementary Figure S6** Quantification of the perimeter fraction of mesenchymal cells per island of control and *Neo1* siRNA treated cells.  $P < 0.0001$

**Supplementary Figure S7** No significant change in EB1 protein levels after *Neo1* knockdown. Each band represents cell lysate proteins from a biological replicate from one experiment. The boxed region has been shown in Figure 6 and the blot has been scanned at high and low contrast.

**Supplementary Figure S8** RT-qPCR of control and *Neo1* knockdown post-transfected Caco-2 cells shows significant downregulation of *KRT8* and *KRT18* in *Neo1* knockdown cells suggesting partial EMT. Data represent mean  $\pm$  SEM of 6 biological replicates,  $p = 0.04$  and  $p = 0.01$  respectively (two-tailed student's t-test)

**Supplementary Figure S9** Kymograph analysis of control and *Neo1*-knockdown Caco-2 cells revealed an increase in the angle of movement of internal cellular features in *Neo1* knockdown cells. Time-lapse movie images (i) captured at 15 sec intervals (ii) were resliced in the time-dimension to create kymographs (iii), which were then analysed using ridge detection (iv) to detect lateral movement of internal features and the Feret angle for each ridge determined (v). See Materials and Methods for details.

**Supplementary Movie S1** - Time-lapse imaging of control and *Neol* knockdown cells was performed and epithelial islands were imaged for a total of 30 min with an image every 15 sec. To quantify the lateral movement of cells, collected sequences were processed with an Image Stabilizer plugin (K. Li, [http://www.cs.cmu.edu/~kangli/code/Image\\_Stabilizer.html](http://www.cs.cmu.edu/~kangli/code/Image_Stabilizer.html)), and then temporally smoothed by calculating a running average over 50 time-frames. The split panel shows an example of time lapse movie before and after smoothing.

**Supplementary Movie S2** - Live imaging of *Neo1* siRNA transfected Caco2 epithelial islands showing cell migration. Images were taken at every 15 sec for a total of 30 min

**Supplementary Movie S3** - Live imaging of control siRNA transfected Caco2 epithelial islands showing stable islands. Images were taken at every 15 sec for a total of 30 min

**Supplementary Movie S4** - Time lapse imaging of EB1 comets in *Neol* siRNA transfected Caco2 cells showed faster comets. Cells were transfected with *Neol* siRNA and EB1-GFP plasmid and 24 h later were imaged over a period of 2 min with an image taken every 2 sec

**Supplementary Movie S5** - Time lapse imaging of EB1 comets in control siRNA transfected Caco2 cells. Cells were transfected with control siRNA and EB1-GFP plasmid and 24 h later were imaged over a period of 2 min with an image taken every 2 sec

**Supplementary Table S1** – Table of genes that were significantly upregulated and downregulated in Pathway enrichment analysis for *Neol* siRNA transfected cells at day 2 post-transfection. Pathway enrichment analysis was performed using iDEP v0.73.

**Supplementary Table S2** - Table of genes that were significantly upregulated and downregulated in Pathway enrichment analysis in *Neol* siRNA transfected cells at day 5 after co-transfection. Pathway enrichment analysis was performed using iDEP v0.73.

**Supplementary Table S3** – Table of genes showing K-means cluster pathway analysis for upregulated and downregulated genes in *Neol* siRNA co-transfected cells

Figure S1

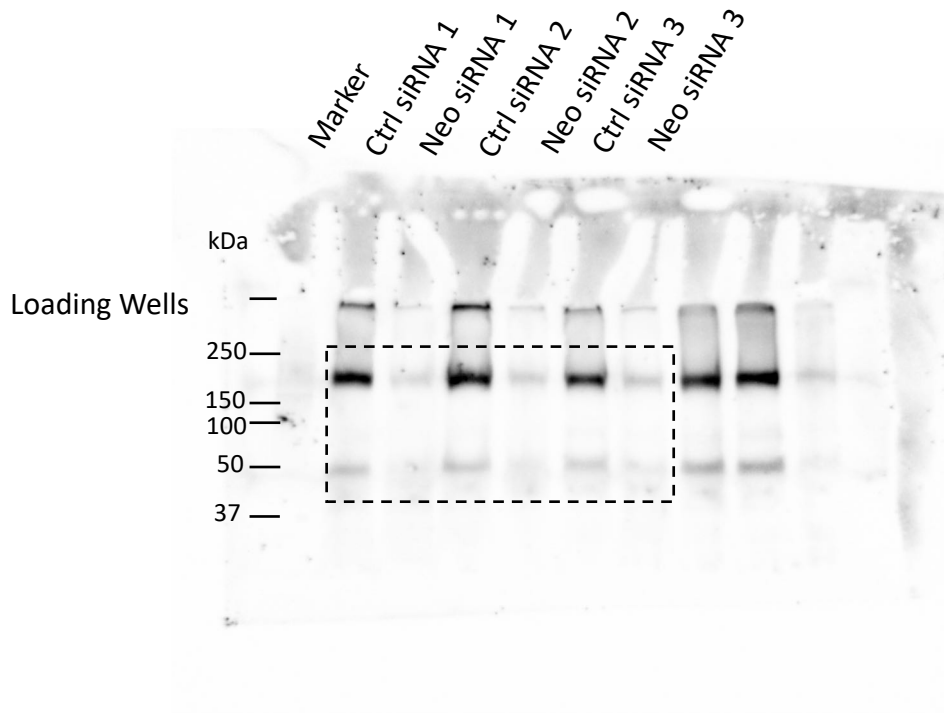

Neogenin western blot

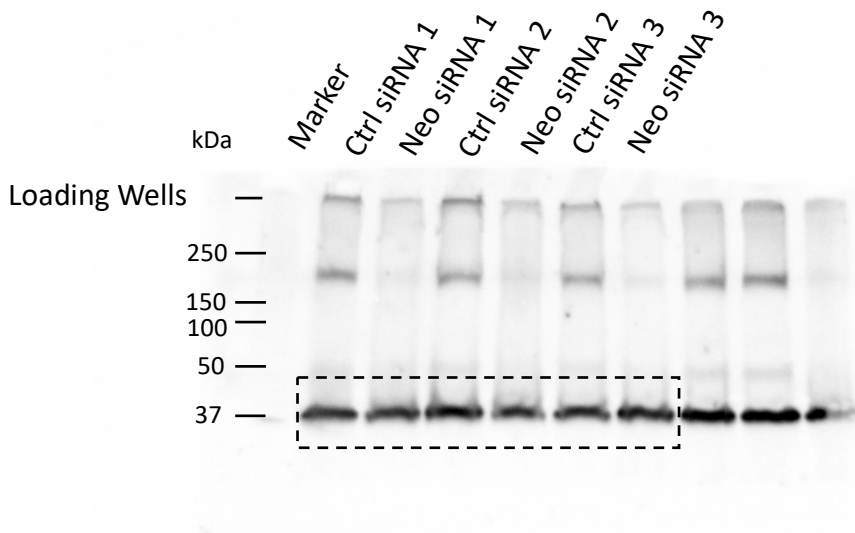

GAPDH western blot

Figure S2

Marker  
Ctrl siRNA 1  
Neo siRNA 1  
Ctrl siRNA 2  
Neo siRNA 2  
Ctrl siRNA 3  
Neo siRNA 3

Marker  
Ctrl siRNA 1  
Neo siRNA 1  
Ctrl siRNA 2  
Neo siRNA 2  
Ctrl siRNA 3  
Neo siRNA 3

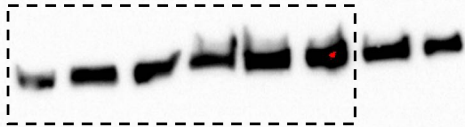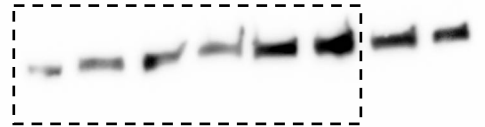

E-Cad blot

High contrast

Low contrast

Marker  
Ctrl siRNA 1  
Neo siRNA 1  
Ctrl siRNA 2  
Neo siRNA 2  
Ctrl siRNA 3  
Neo siRNA 3

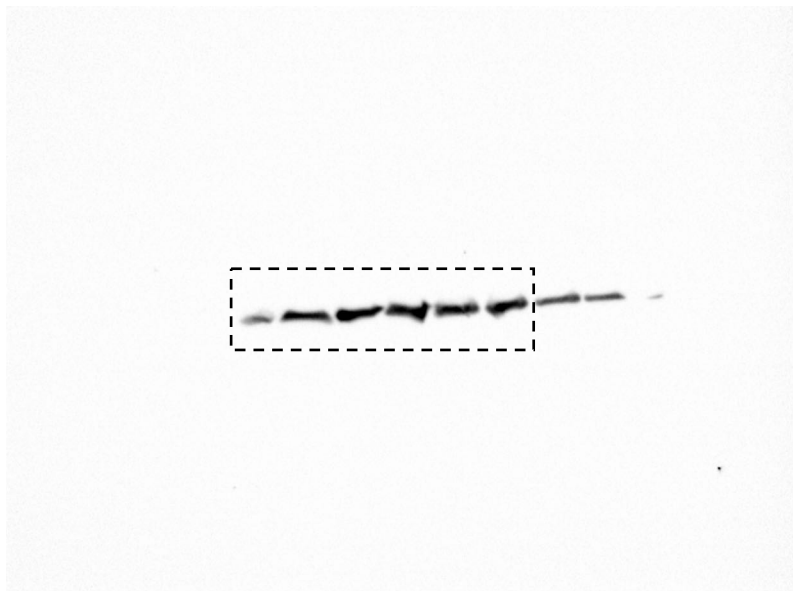

GAPDH blot

Figure S3

ZO-1 blot

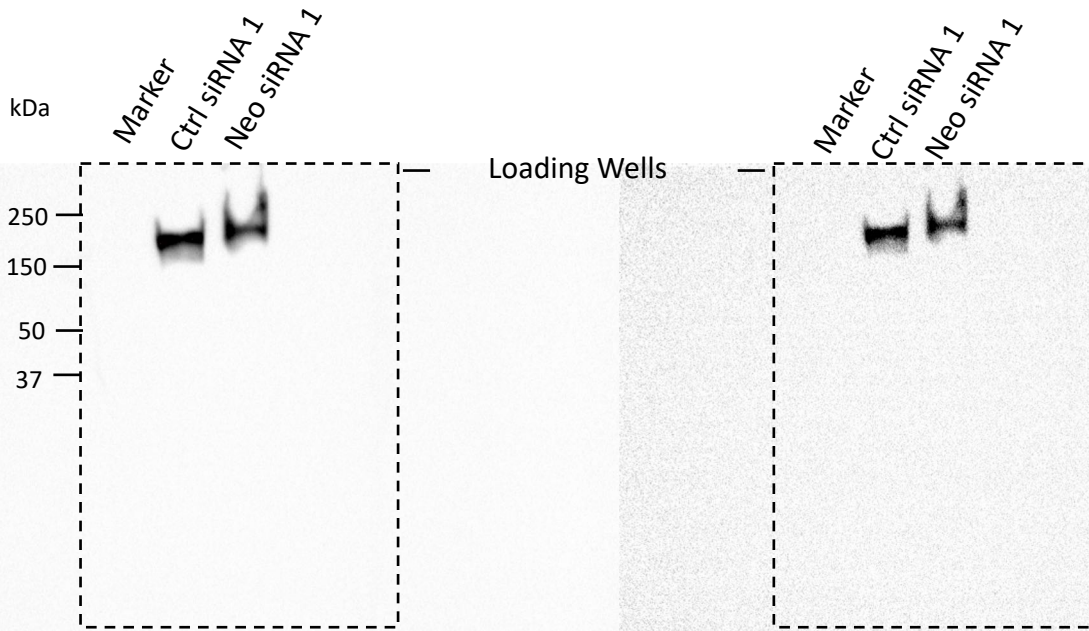

High contrast

Low contrast

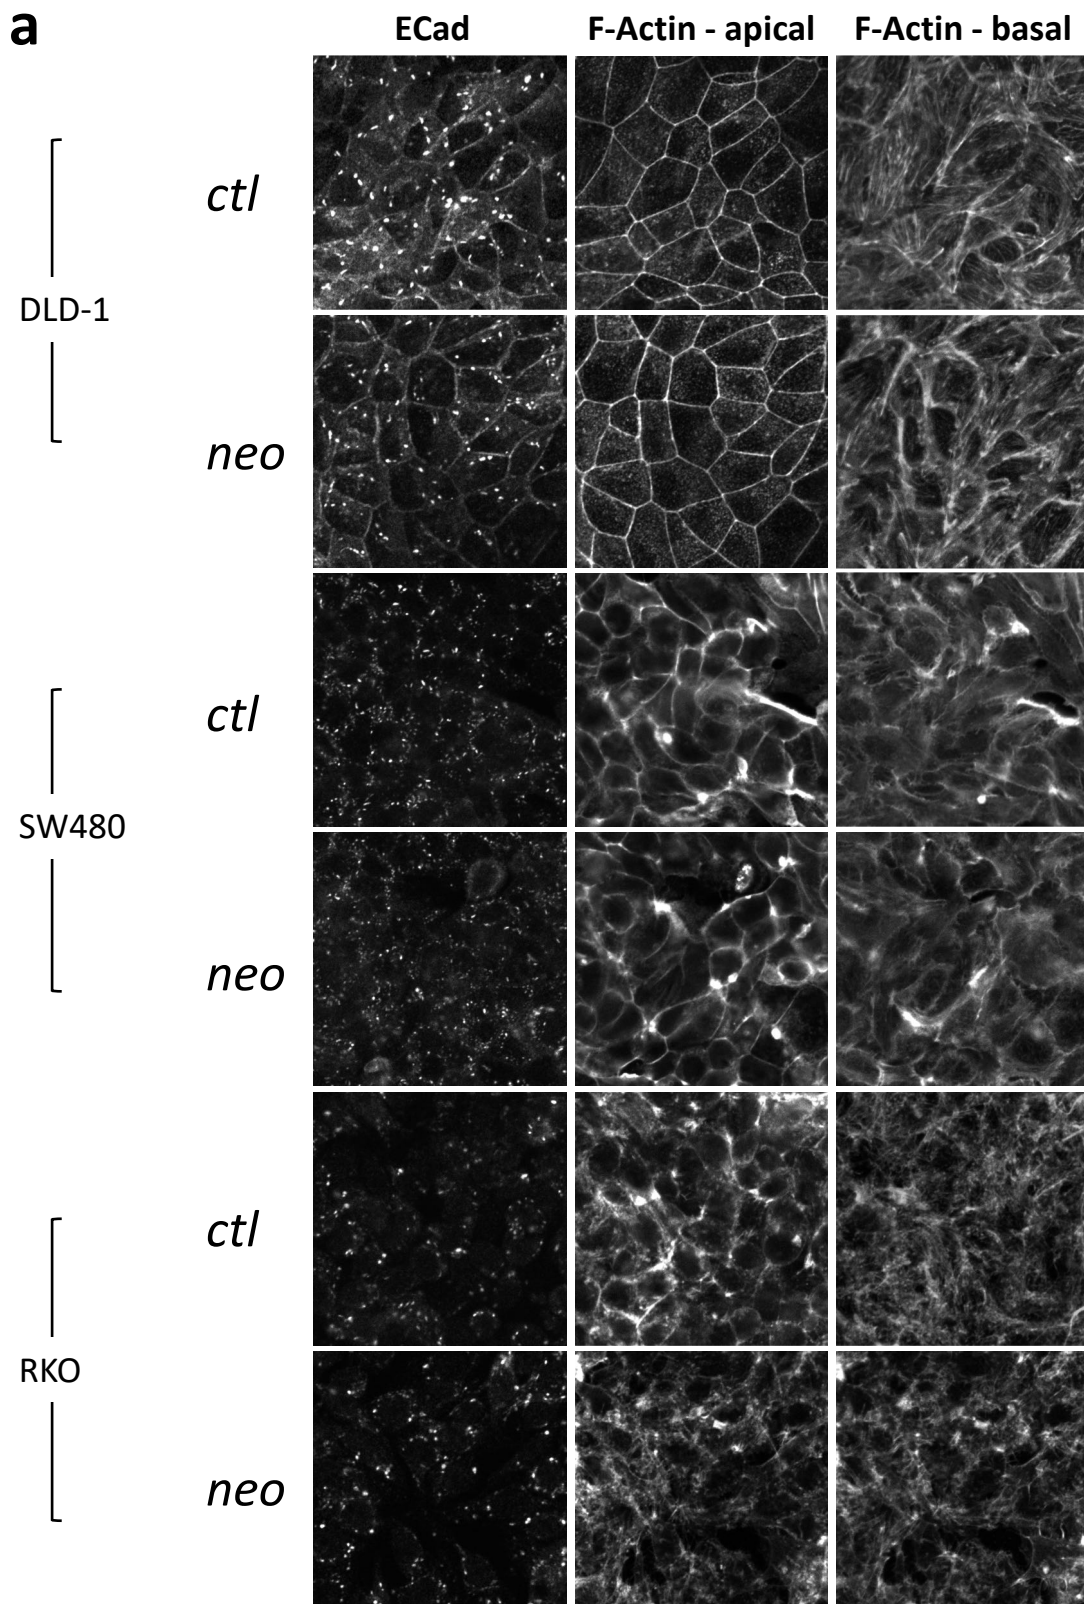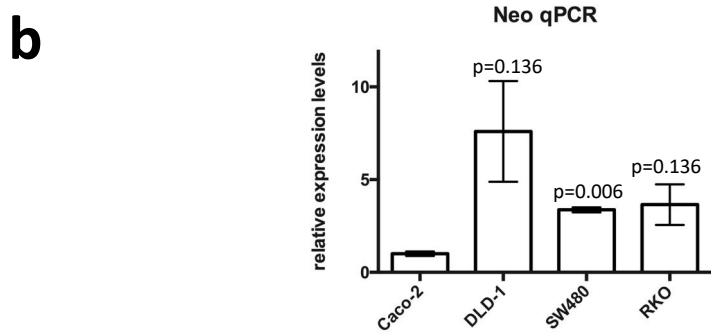

Figure S5

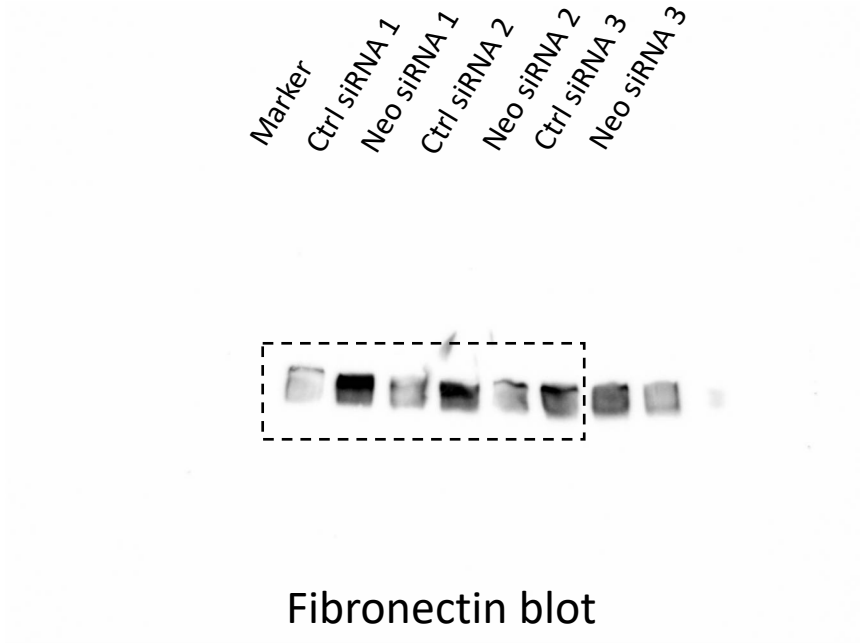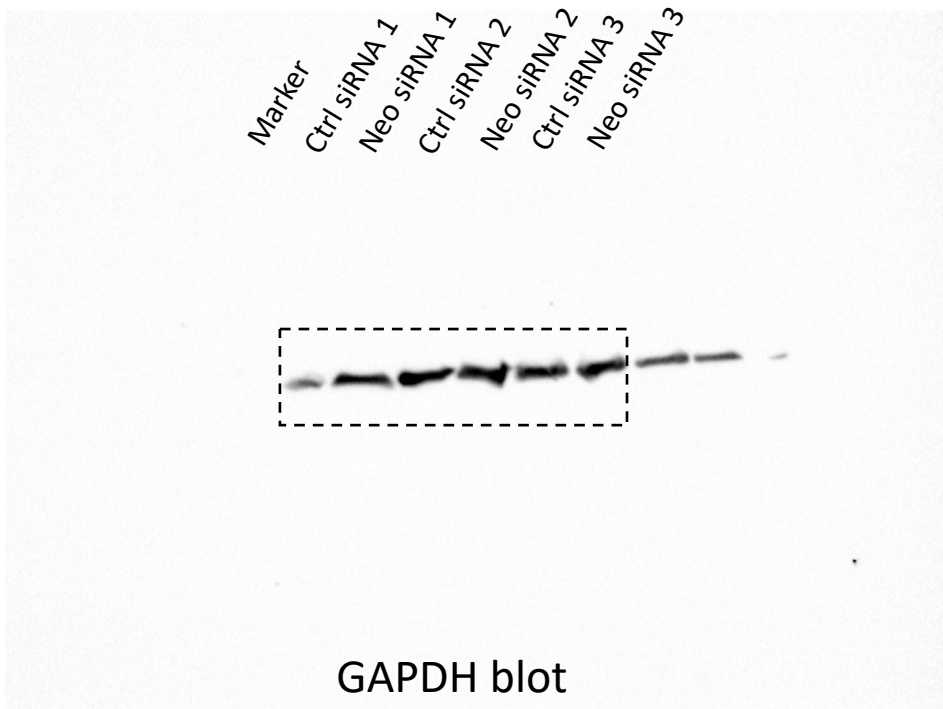



Figure S6

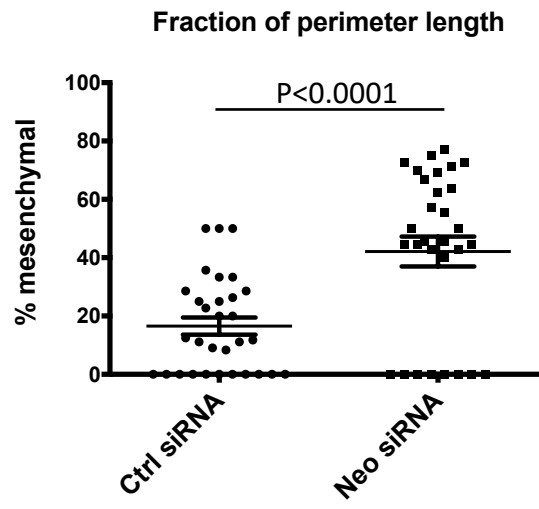

Figure S7

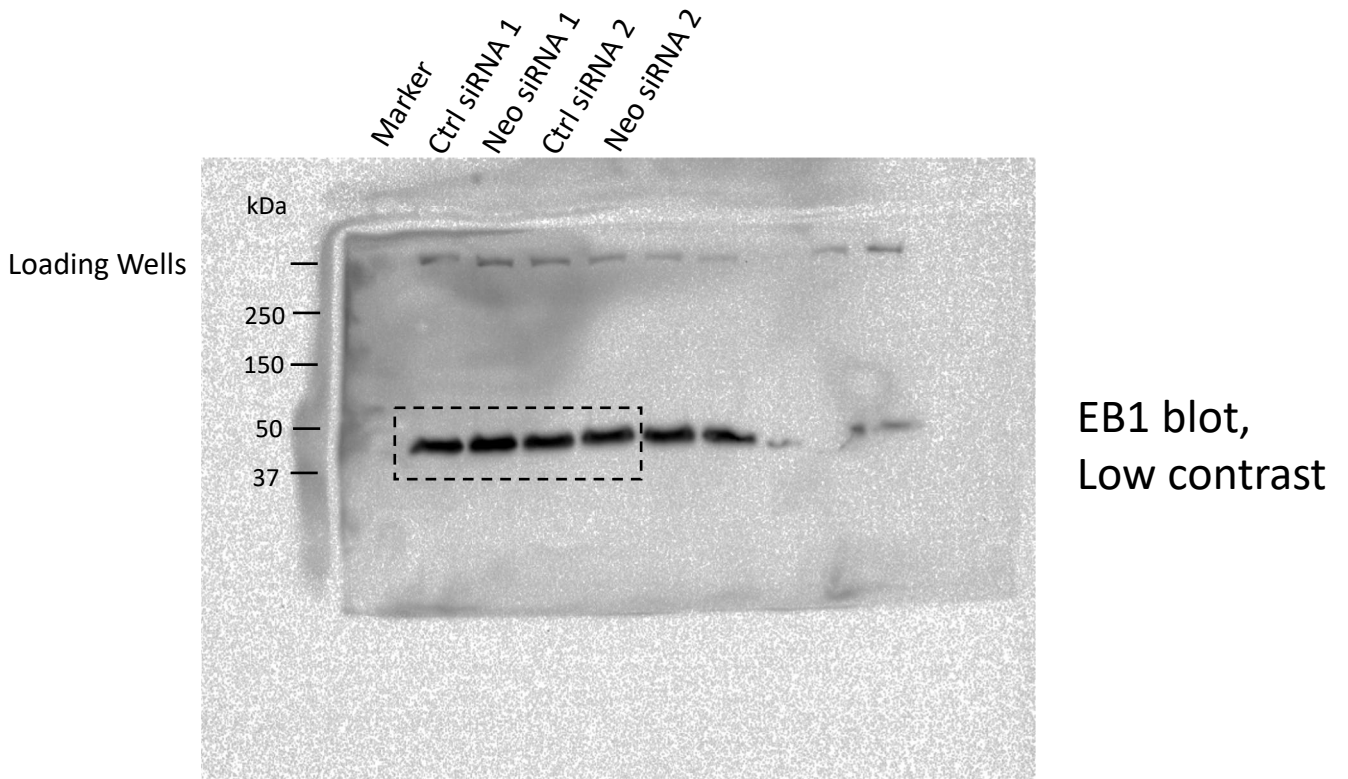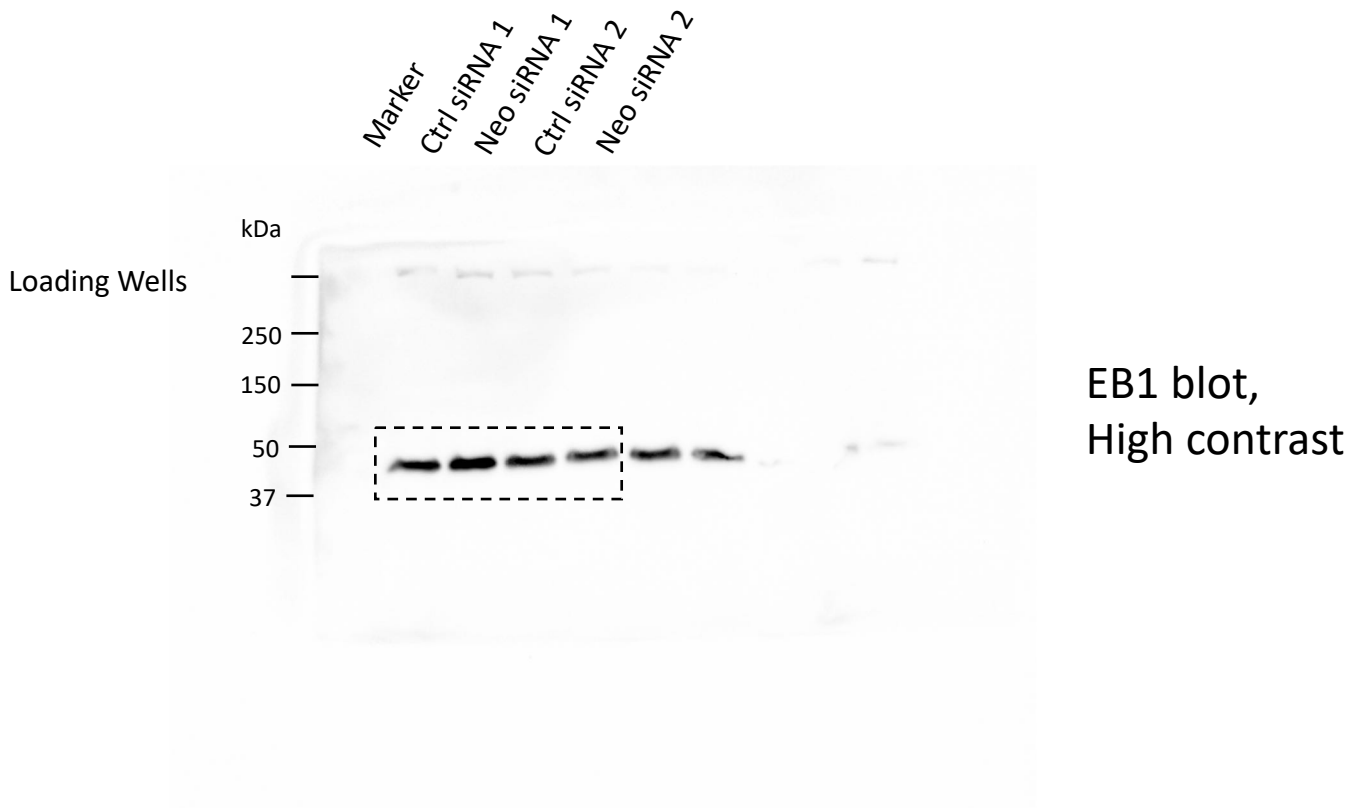

Figure S8

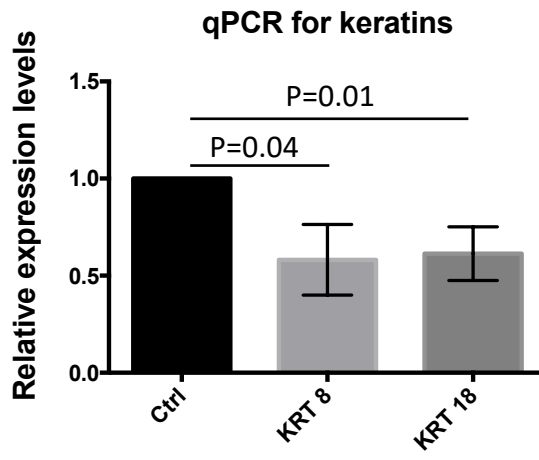

Figure S9

Kymograph construction

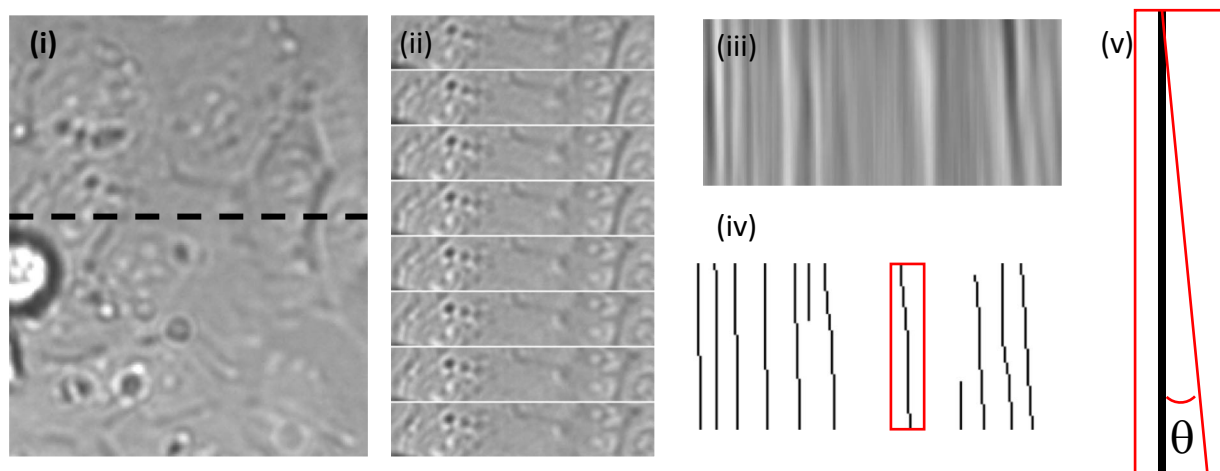

Supplement: 41598_2019_40886_MOESM1_ESM.pdf [file 41598_2019_40886_MOESM1_ESM.pdf]
